# Supplementary material
Source: publisher figshare collection journal article supplement (https://acs.figshare.com/ndownloader/files/4755835)

# Persistent One-Dimensional Face-to-Face $\pi$ -Stacks within Organic Cocrystals.

Anatoliy N. Sokolov,<sup>a</sup> Tomislav Friščić,<sup>a</sup> Steven P. Blais,<sup>b</sup> John A. Ripmeester<sup>b</sup> and Leonard R. MacGillivray<sup>a,\*</sup>

<sup>a</sup> Department of Chemistry, University of Iowa, Iowa City, IA 52242-1294 (USA)

<sup>b</sup> Steacie Institute for Molecular Science, National Research Council of Canada, Ottawa, Ontario, Canada, K1A 0R6.

## SUPPLEMENTARY MATERIAL

**S1.** General information.

**S2.** Thermogravimetric analysis.

**S3.** X-ray crystallography.

**S4.** <sup>1</sup>H NMR spectra of **1**, **2**, and **3**.

**S5.** TGA thermograms of **1**, **2**, and **3**.

**S6.** FTIR spectra of samples **1**, **2**, and **3** (KBr).

## S1. General Information:

For the synthesis of the co-crystals: 4,4'-dipyridyl and *trans*-1,2-bis-(4-pyridyl)ethylene, were commercially available (Aldrich Co.). *Trans*-1,2-bis-(4-pyridyl)acetylene was prepared according to the literature.<sup>[1]</sup> *Trans*-1,2-bis-(4-pyridyl)ethylene was purified by the addition of activated carbon to a solution of *trans*-1,2-bis-(4-pyridyl)ethylene in hot EtOH, stirring for 30 min, filtration and recrystallization from EtOH.

## S2. Thermogravimetric Analysis:

Thermogravimetric analysis shows that all three samples experience a single mass loss that begins at 100° (1), 110° (2), and 125° (3). The hydrogen bond distances for 1, 2 and 3 are reflected in the stabilities of the solids, as revealed by the onset of the mass loss.

## S3. X-ray Crystallography:

Crystal data for **1**: monoclinic,  $P 2_1/c$ ,  $a = 7.609(1) \text{ \AA}$ ,  $b = 19.338(2) \text{ \AA}$ ,  $c = 9.911(1) \text{ \AA}$ ,  $\beta = 110.09(1)^\circ$ ,  $V = 1369.7(3) \text{ \AA}^3$ ,  $Z = 4$ ,  $\rho_{\text{calc}} = 1.29 \text{ g/cm}^3$ ,  $R_1 = 0.047$  for 2480 reflections with  $I > 2\sigma(I)$ .

Crystal data for **2**: triclinic,  $P \bar{1}$ ,  $a = 7.731(1) \text{ \AA}$ ,  $b = 9.582(1) \text{ \AA}$ ,  $c = 11.110(1) \text{ \AA}$ ,  $\alpha = 75.67(1)^\circ$ ,  $\beta = 80.77(1)^\circ$ ,  $\gamma = 74.24(1)^\circ$ ,  $V = 763.6(1) \text{ \AA}^3$ ,  $Z = 2$ ,  $\rho_{\text{calc}} = 1.26 \text{ g/cm}^3$ ,  $R_1 = 0.052$  for 1905 reflections with  $I > 2\sigma(I)$ .

Crystal data for **3**: monoclinic,  $P 2_1/n$ ,  $a = 7.721(1) \text{ \AA}$ ,  $b = 9.152(1) \text{ \AA}$ ,  $c = 21.737(2) \text{ \AA}$ ,  $\beta = 91.74(1)^\circ$ ,  $V = 1535.2(1) \text{ \AA}^3$ ,  $Z = 2$ ,  $\rho_{\text{calc}} = 1.15 \text{ g/cm}^3$ ,  $R_1 = 0.045$  for 2083 reflections with  $I > 2\sigma(I)$ .

All crystal data were measured on a Nonius Kappa CCD single-crystal X-ray diffractometer at liquid nitrogen temperature. After anisotropic refinement of non-hydrogen atoms, hydrogen atoms bonded to  $sp^2$  hybridized atoms, hydroxyl and amine groups were placed in idealized positions and allowed to ride on the atom to which they are attached. The ladder inclination angle,  $\theta$ , was based on the angle between three points as defined by N2, N1, and N1 of the next crystallographically identical pyridine-based rung. Structure solution was accomplished with the aid of SHELXS-97 and refinement was conducted using SHELXL-97 locally implemented on a Pentium-based IBM compatible computer.<sup>[2]</sup> Crystallographic data (excluding structure factors) for the structures reported in this paper have been deposited with the Cambridge Crystallographic Data Centre as supplementary publication no. CCDC-295847 (1), CCDC-295848 (2), CCDC-295849 (3). Copies of the data can be obtained free of charge on application to CCDC, 12 Union Road, Cambridge CB21EZ, UK (fax: (+44) 1223-336-033; E-mail: [deposit@ccdc.cam.ac.uk](mailto:deposit@ccdc.cam.ac.uk)).

## References:

Champness, N. R.; Khlobystov, A. N.; Majuga, A. G.; Schroder, M.; Zyk, N. V. *Tetrahedron Lett.* **1999**, *40*, 5413.

(1) Sheldrick, G. M. *SHELXL-97*, University of Göttingen, Germany, **1997**.

S4.  $^1\text{H}$  NMR spectra of **1**, **2**, and **3**.

**1**

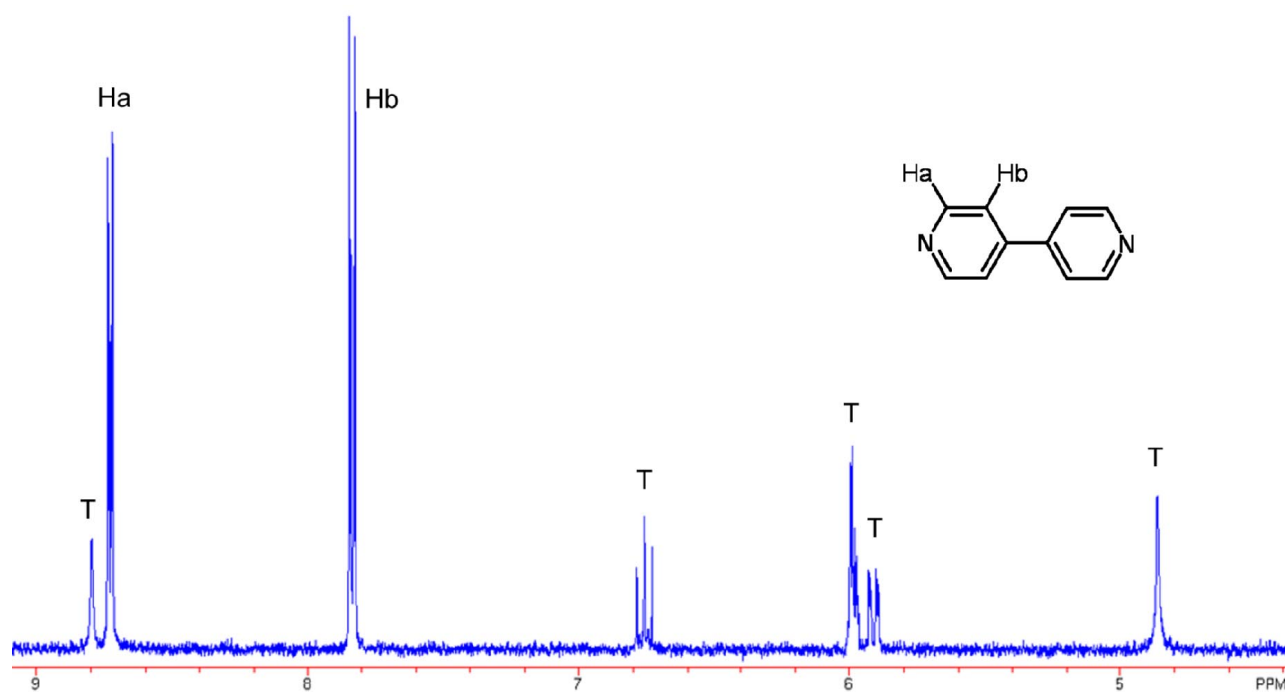

T = 3-aminophenol

**2**

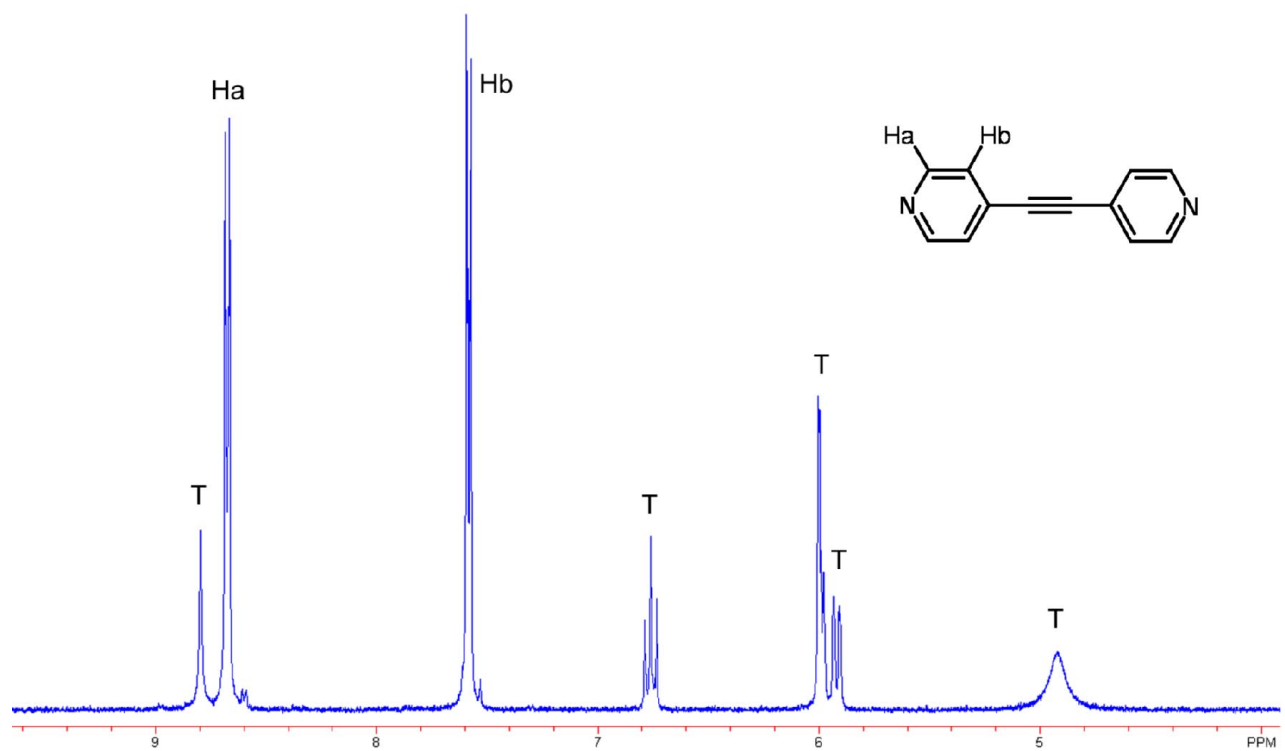

T = 3-aminophenol

3

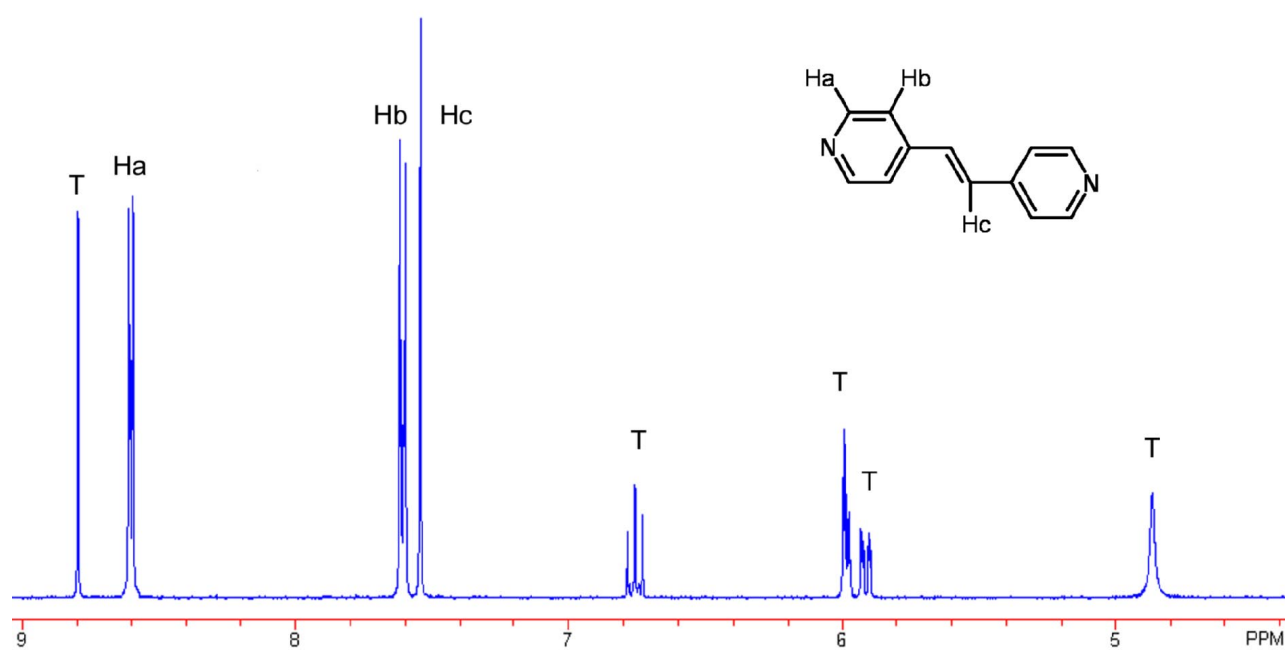

T = 3-aminophenol

**S5.** TGA thermograms of **1**, **2**, and **3**.

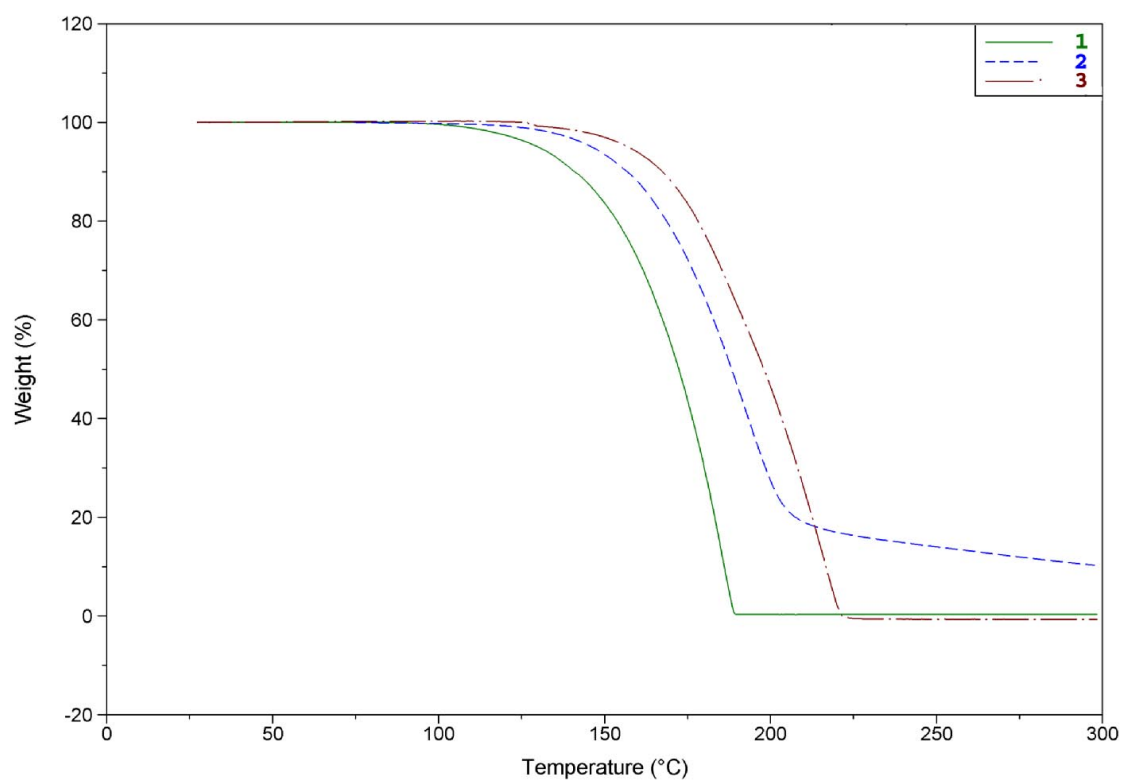

## S6. FTIR spectra of samples 1, 2, and 3 (KBr).

**A) – 3**

**B) – 2**

**C) – 1**

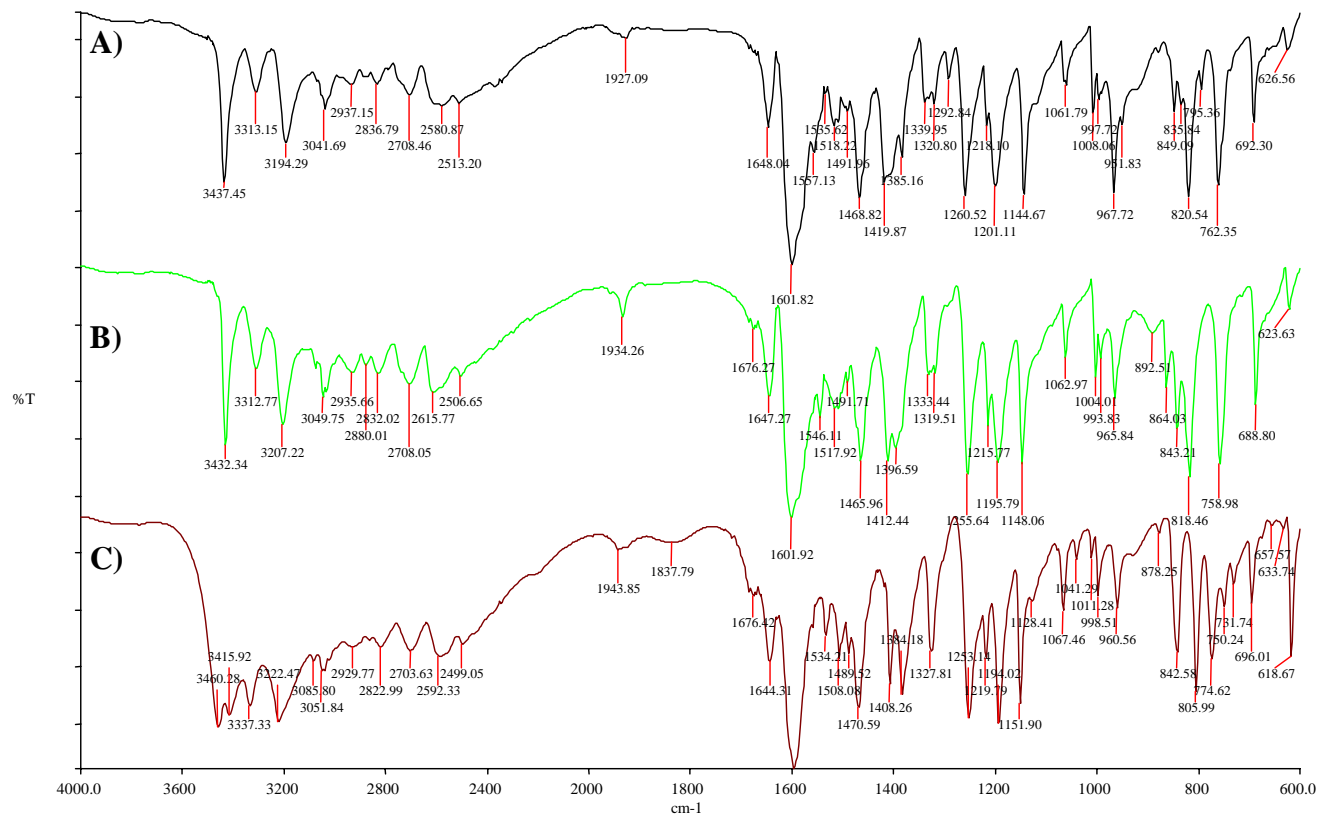

Supplement: Supplementary file 1 [file 4755835]
